# Supplementary material for: Targeting CAR-T cell senescence through Mysm1-SSBP1 axis improves persistence and therapeutic efficacy
Source: Research Square preprint supplement (doi:10.21203/rs.3.rs-6947364/v1), 2025-07-08
Supplement: Supplementary file 1 [file 3aa99cf0ad759dae13536bbb.docx]

**Targeting CAR-T cell senescence through Mysm1-SSBP1 axis improves persistence and therapeutic efficacy**

Songbo Zhao1,2, Huimin Liu1,2, Minghao Sui3, Yuchan Xue3, Baihui Wang4, Tianru Zhang3, Han Ding3, Xinyu Wang3, Jianni Qi1, Hong Guo5, Qiang Zhu6*, Lifen Gao2,7*


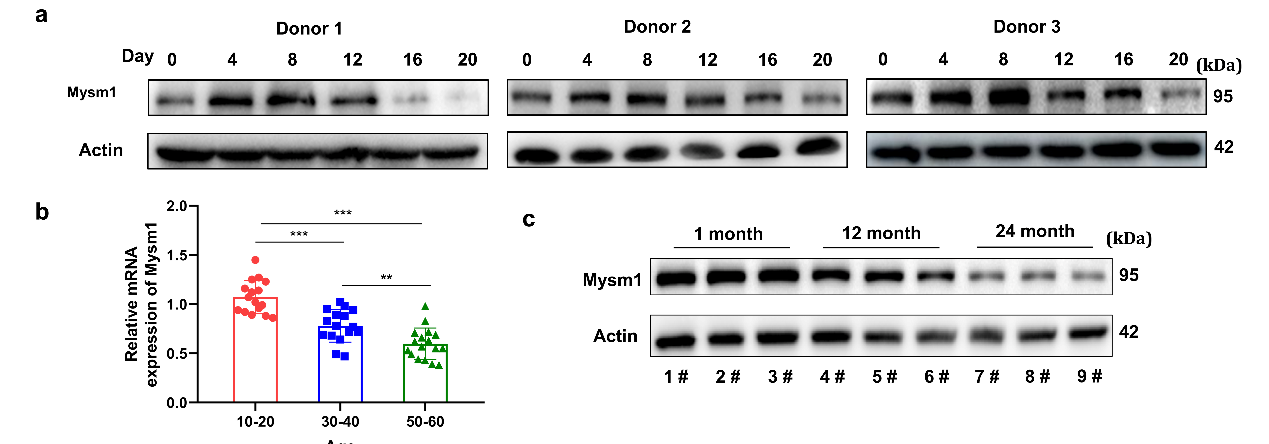


Extended Data Fig. 1. Mysm1 expression in T cells correlates with age.

**a**, Temporal changes in Mysm1 expression in human T cells from peripheral blood during culture. **b**, Mysm1 expression in peripheral blood T cells across different age groups. **c**, Mysm1 expression in splenic T cells across age groups in mice. Data are presented as mean ± SD from three independent experiments. ***p* < 0.01, ****p* < 0.001 compared with indicated group by One-way ANOVA.


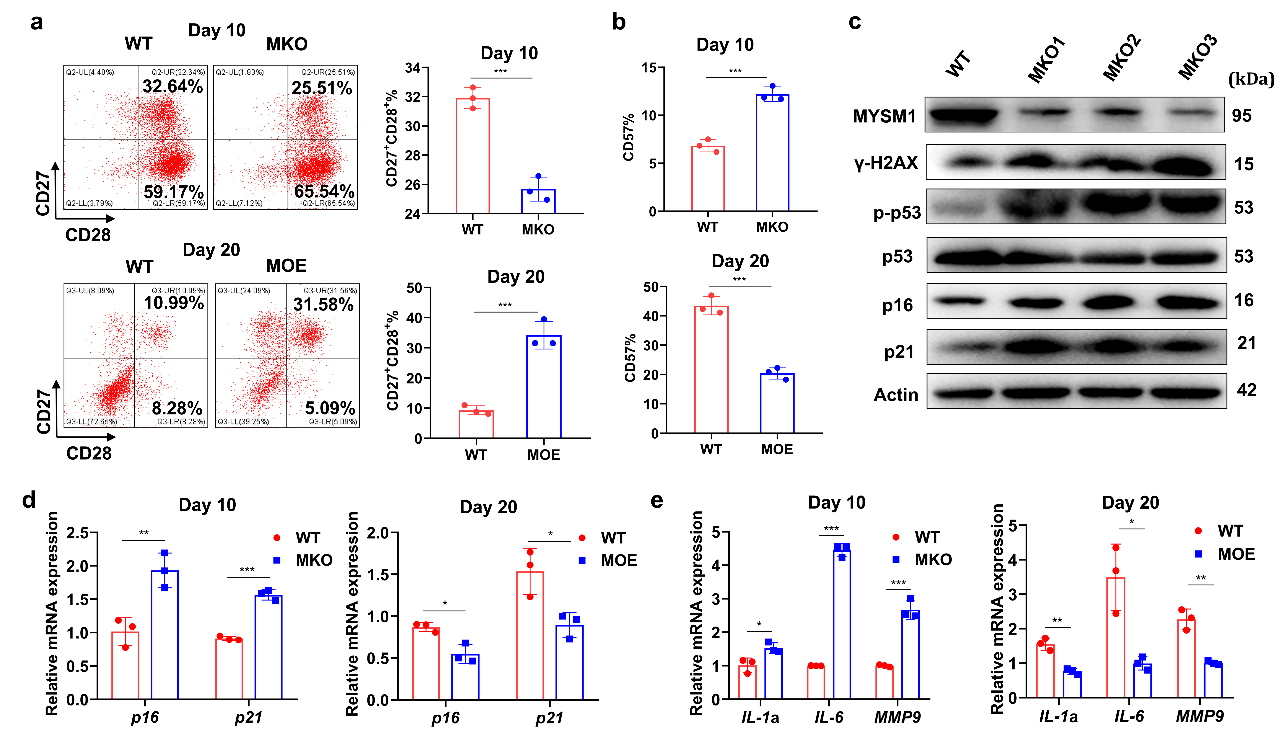


Extended Data Fig. 2. Mysm1 serves as a critical regulator of T cell senescence.

**a**, Comparative analysis CD27+CD28+ phenotype of Mysm1-deficient (day 10) and Mysm1-overexpressing (day 20) human T cells. **b**, Comparative analysis of CD57 in Mysm1-deficient (day 10) and Mysm1-overexpressing (day 20) human T cells. **c**, Senescence-associated marker profiling in Mysm1-deficient human T cells. **d**, The expression of *p21* and *p16* in Mysm1-deficient and overexpressing human T cells. **e**, SASP in Mysm1-deficient human T cells. Data are presented as mean ± SD from three independent experiments. ns means no significant difference, **p* < 0.05, ***p* < 0.01, ****p* < 0.001 compared with indicated group by Student’s *t* test.


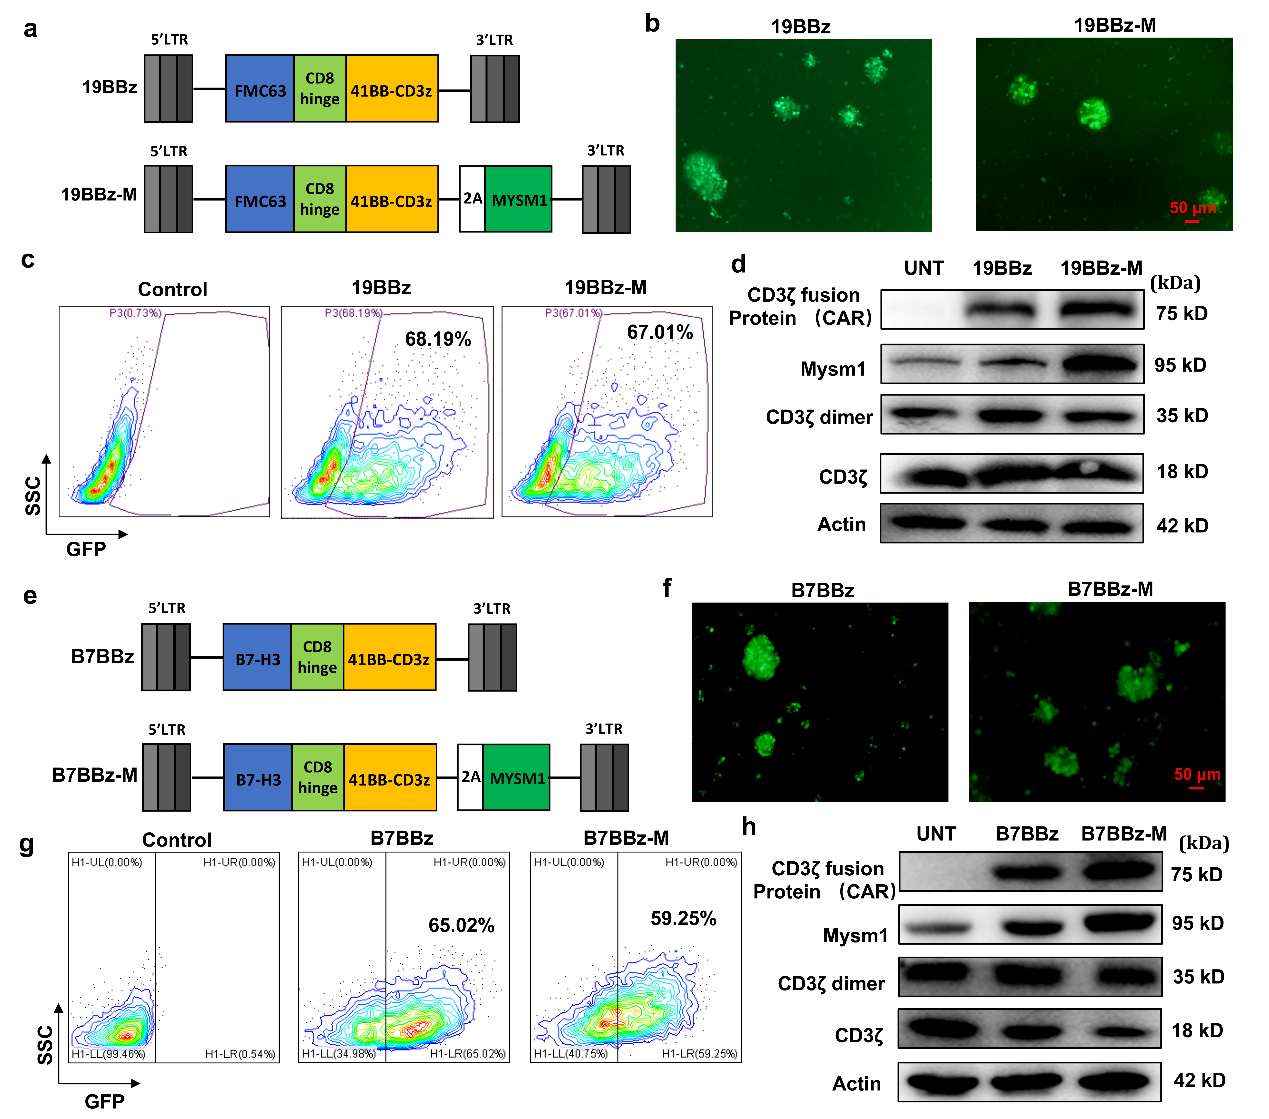


Extended Data Fig. 3. The construction and identification of CAR-T cells.

**a**, The structure of 19BBz and 19BBz-M CAR-T cells. **b**, 19BBz CAR-T cells were measured by fluorescence microscope. Scale bar, 50 μm. **c**,**d**, CAR expression of 19BBz and 19BBz-M constructs were quantified by flow cytometry and western blotting. **e**, The structure of B7BBz and B7BBz-M CAR-T cells. **f**, B7BBz CAR-T cells were measured by fluorescence microscope. Scale bar, 50 μm. **g**,**h**, Flow cytometry and western blotting assay of B7BBz and B7BBz-M CAR-T cells.


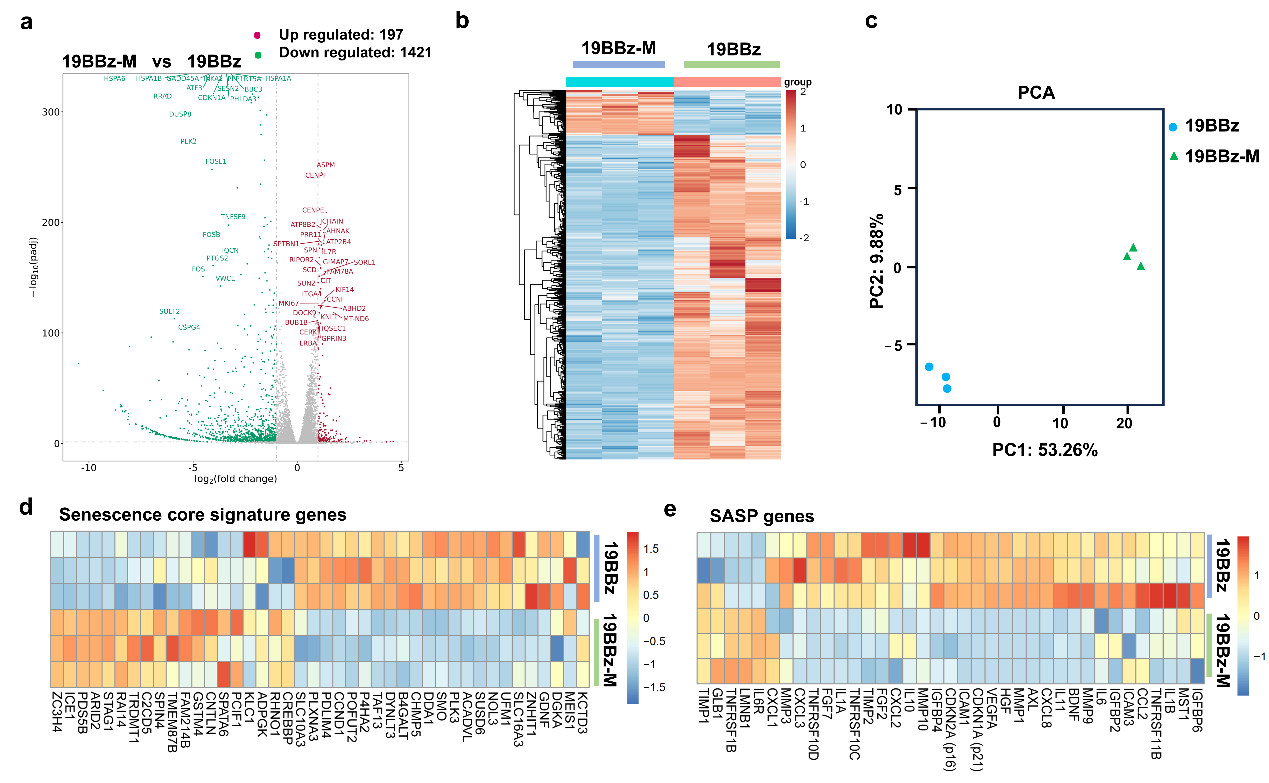


Extended Data Fig. 4. Comparative transcriptomic profiling of 19BBz versus 19BBz-M CAR-T cells by RNA sequencing.

**a**, Volcano plot. **b**, Heatmap. **c**, The PCA analysis. **d**, Differential regulation of senescence core signature genes in 19BBz versus 19BBz-M CAR-T cell populations. **e**, SASP gene pathway change between 19BBz and 19BBz-M CAR-T cells.


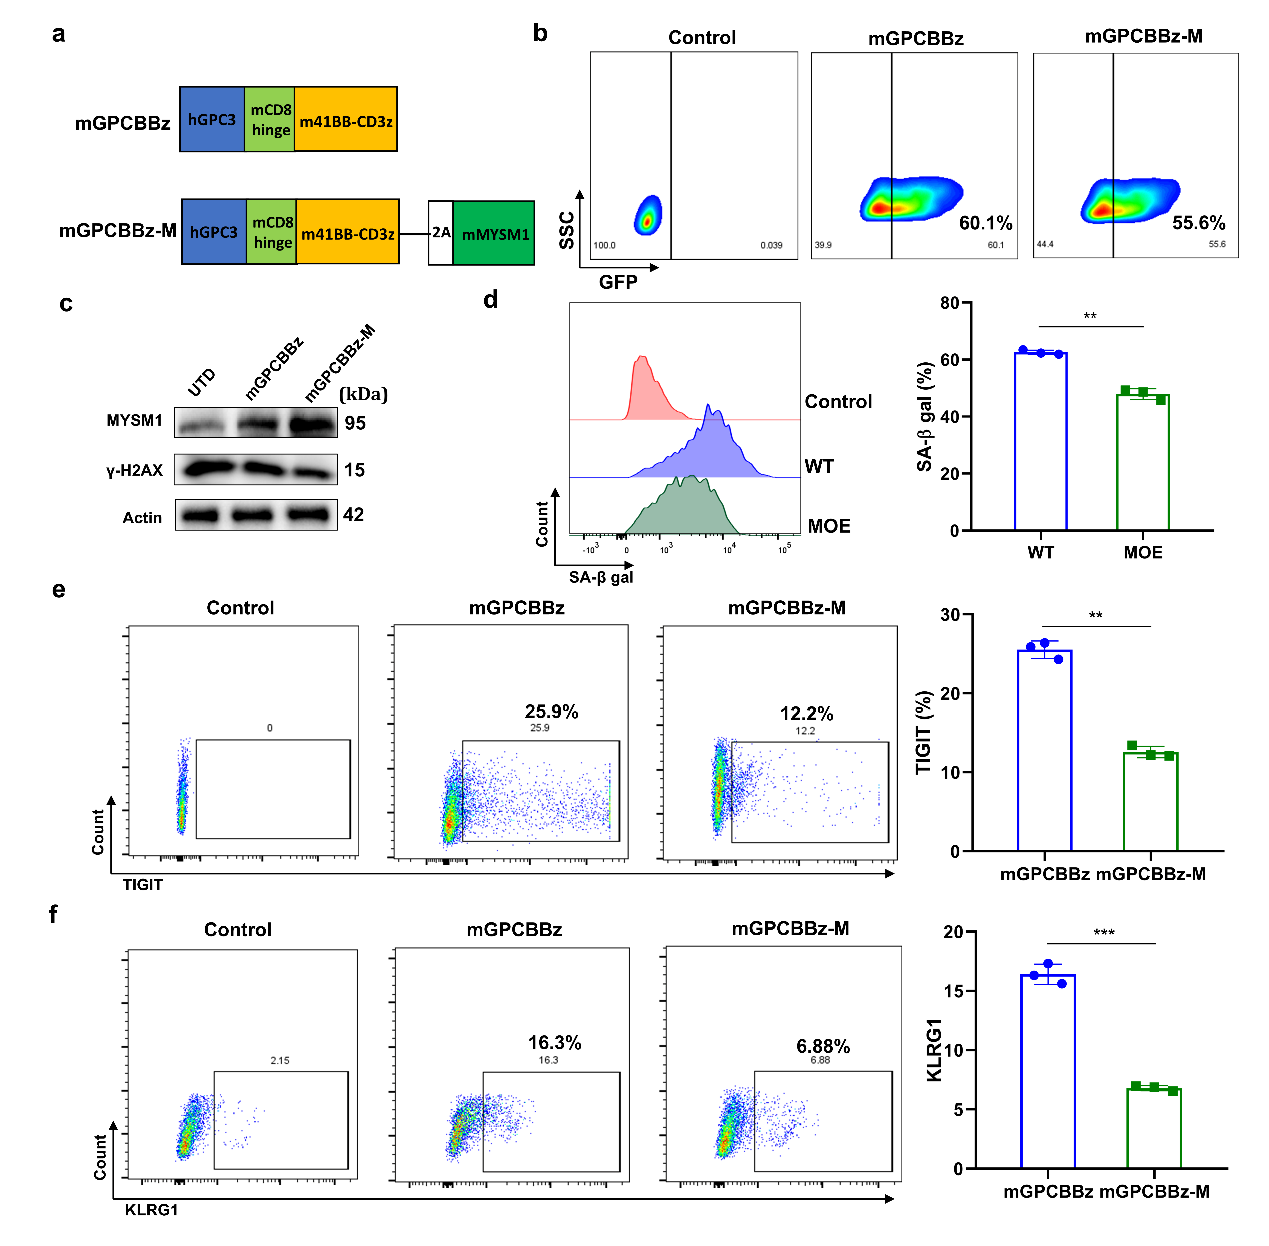


Extended Data Fig. 5. Mysm1 overexpression attenuates cellular senescence in murine CAR-T cells.

**a**, The structure of mouse GPCBBz CAR. **b**, The positive rate of GPCBBz CAR-T cells. **c-f**, The detection of γ-H2AX, SA-β gal, TIGIT and KLRG1 in mGPCBBz and mGPCBBz-M CAR-T cells. Data are presented as mean ± SD from three independent experiments. ***p* < 0.01, ****p* < 0.001 compared with indicated group by Student’s *t* test.


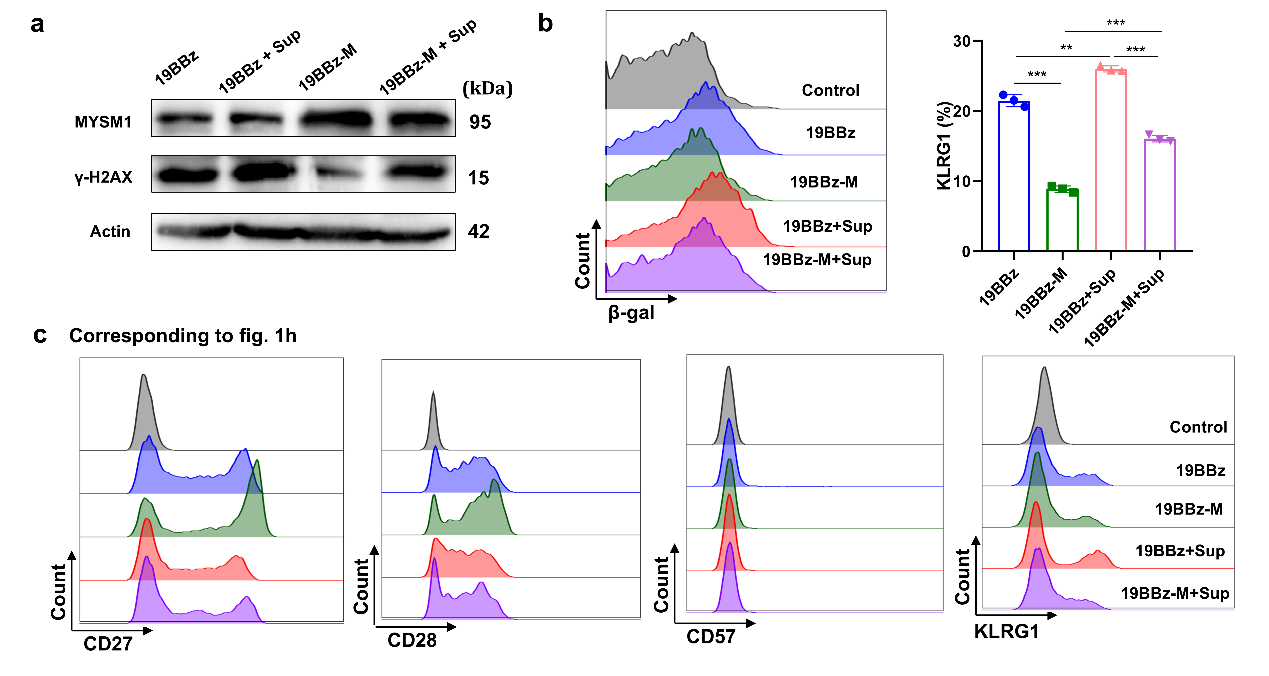


Extended Data Fig. 6. Mysm1 down-regulates senescence associated markers.

**a**, Mysm1 overexpression significantly suppressed TCM-induced γ-H2AX expression in CAR-T cells. **b**, The SA-β gal detection. **c**, The flow cytometry figure corresponding to Figure 1h. Data are presented as mean ± SD from three independent experiments. ***p* < 0.01, ****p* < 0.001 compared with indicated group by One-way ANOVA.


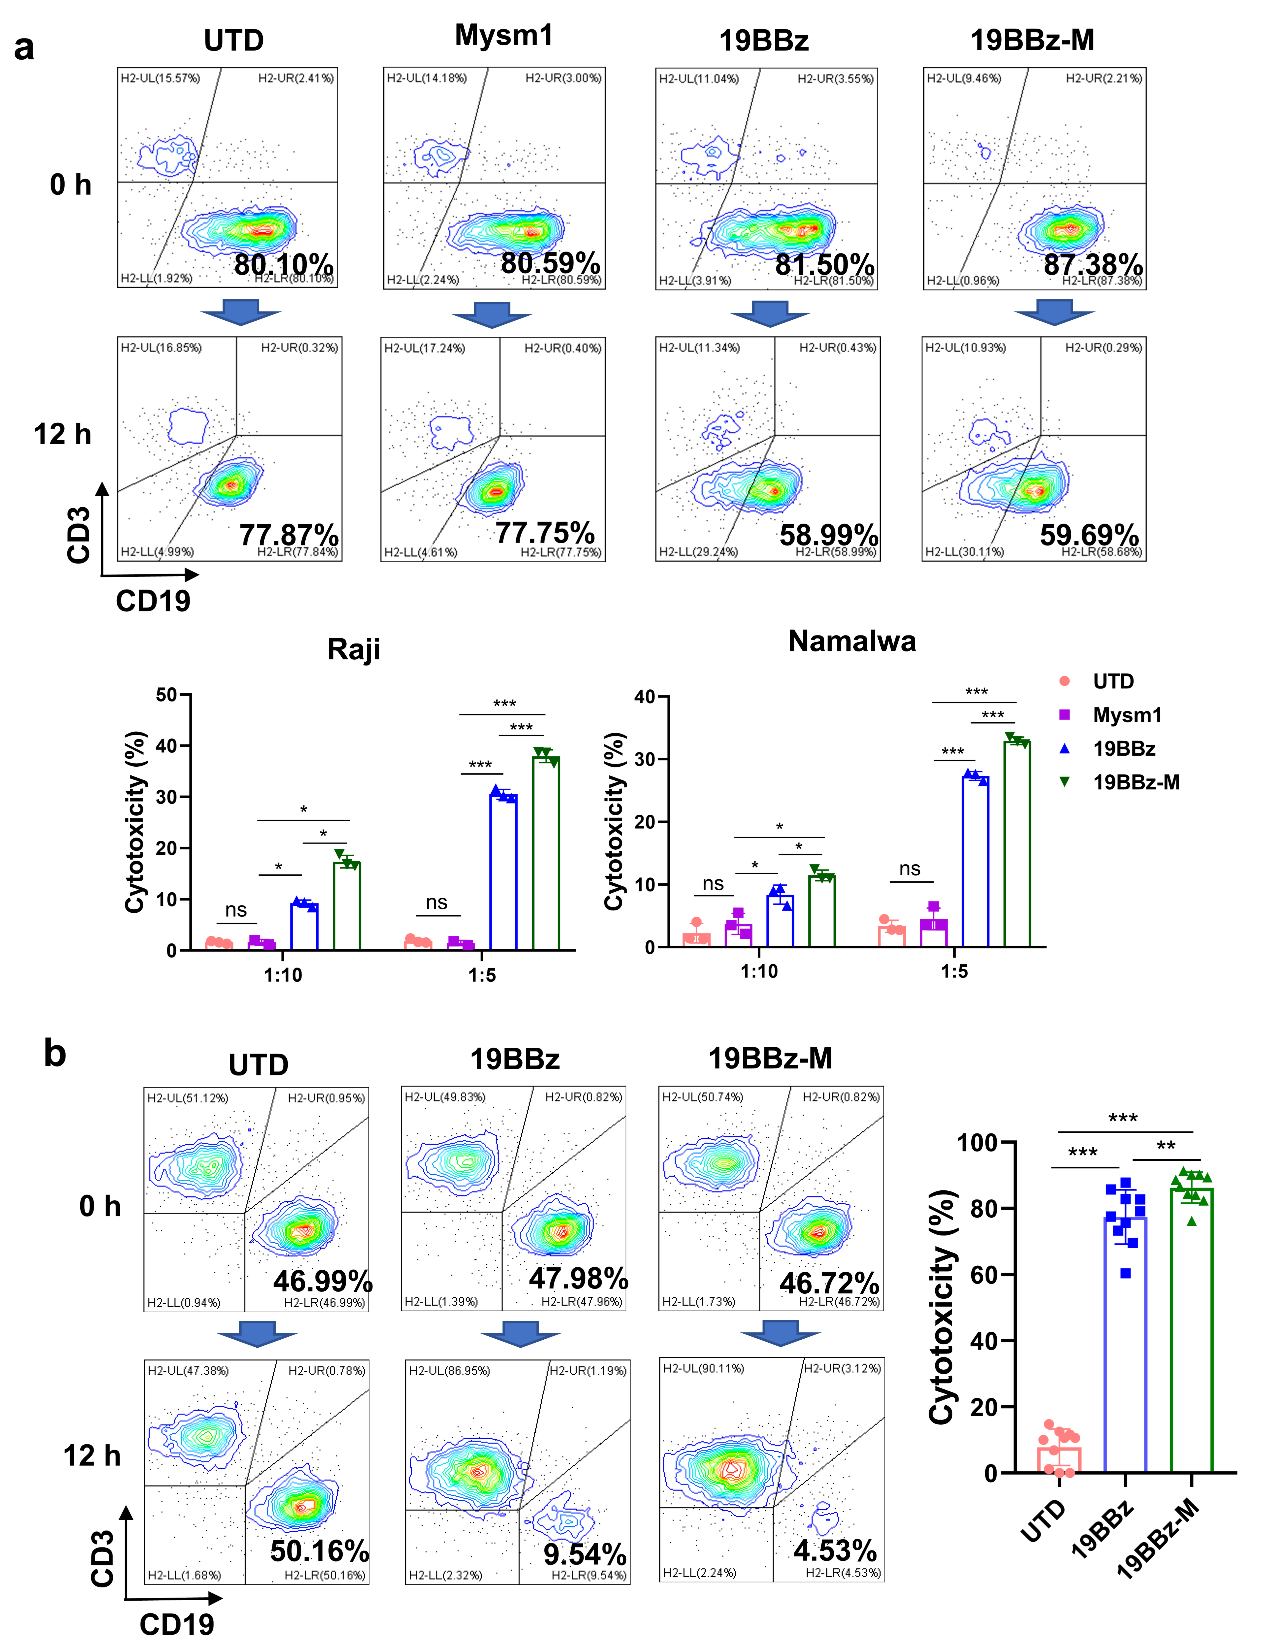


Extended Data Fig. 7. Mysm1 improves cytotoxicity of 19BBz CAR-T cells.

**a**, The cytotoxicity of 19BBz CAR-T cell to B cell lymphoma Raji and namalwa. **b**, Antitumor efficacy of 19BBz CAR-T cell against primary B-cell lymphoma specimens from patients. Data are presented as mean ± SD from multiple independent experiments. ns means no significant difference, **p* < 0.05, ***p* < 0.01, ****p* < 0.001 compared with indicated group by One-way ANOVA.


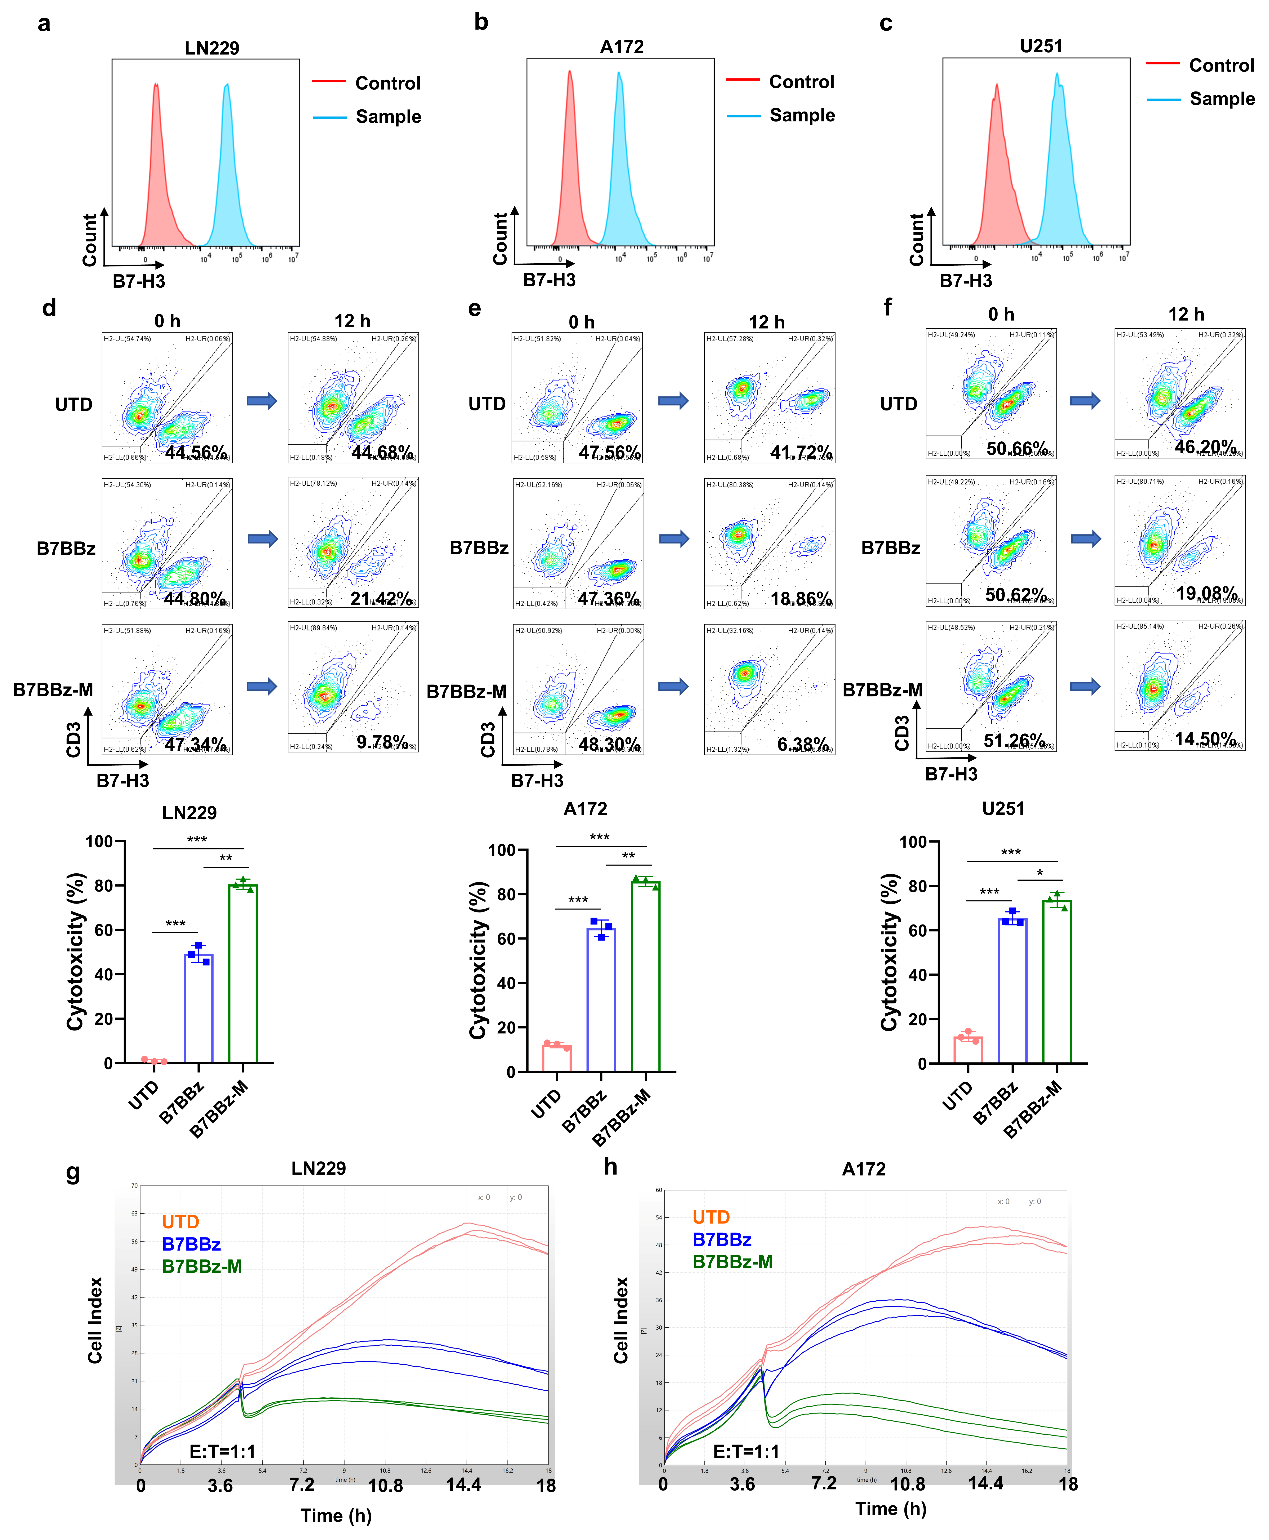


Extended Data Fig. 8. Mysm1 enhances cytotoxicity of B7BBz CAR-T cells.

**a-c**, The expression of B7-H3 in LN229, A172 and U251 cell lines. **d-f**, The cytotoxicity of B7BBz CAR-T cell to LN229, A172 and U251 cell lines. **g**,**h**, Cytotoxicity of B7BBz CAR-T cell against to LN229 and A172 cells at E:T ratio of 1:1 was assayed using real-time monitor. Data are presented as mean ± SD from three independent experiments. **p* < 0.05, ***p* < 0.01, ****p* < 0.001 compared with indicated group by One-way ANOVA.


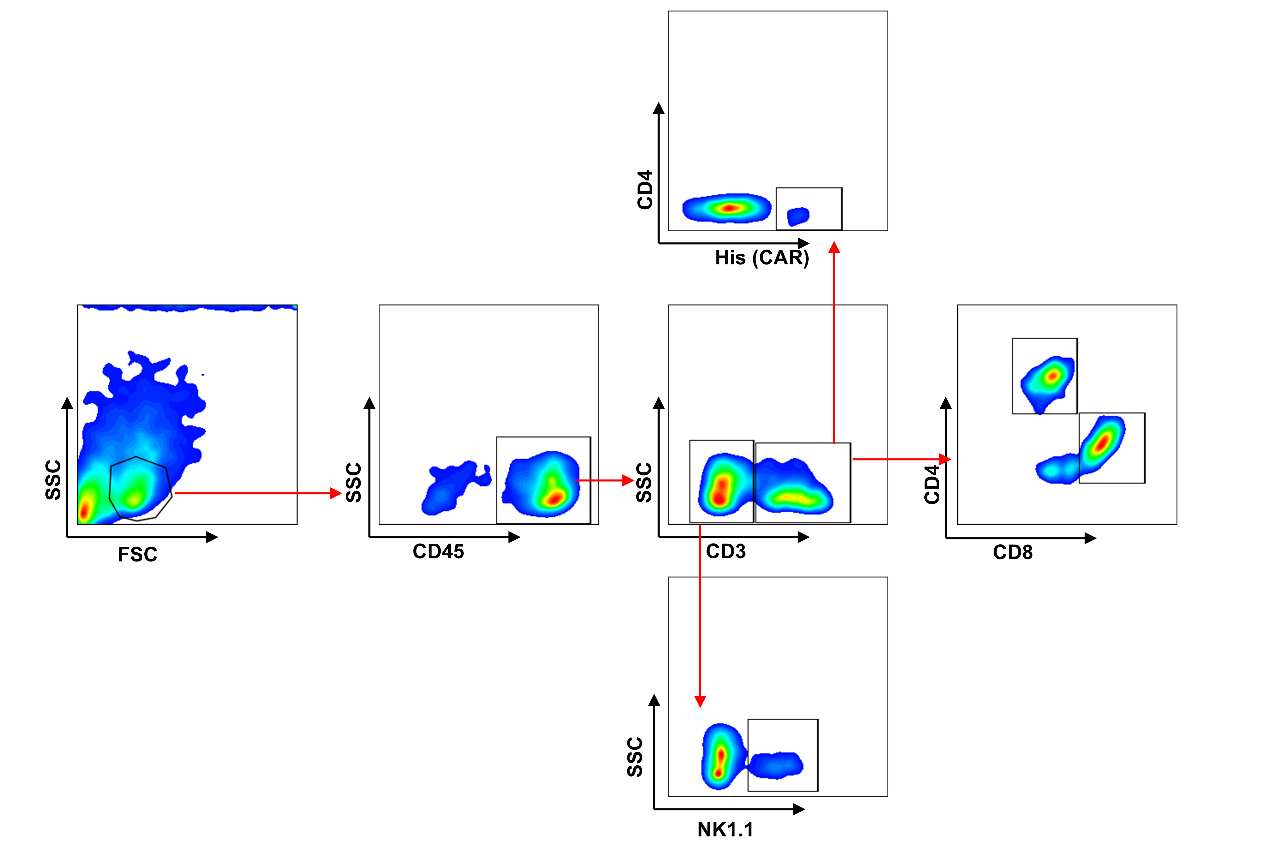


Extended Data Fig. 9. The flow gate strategy.


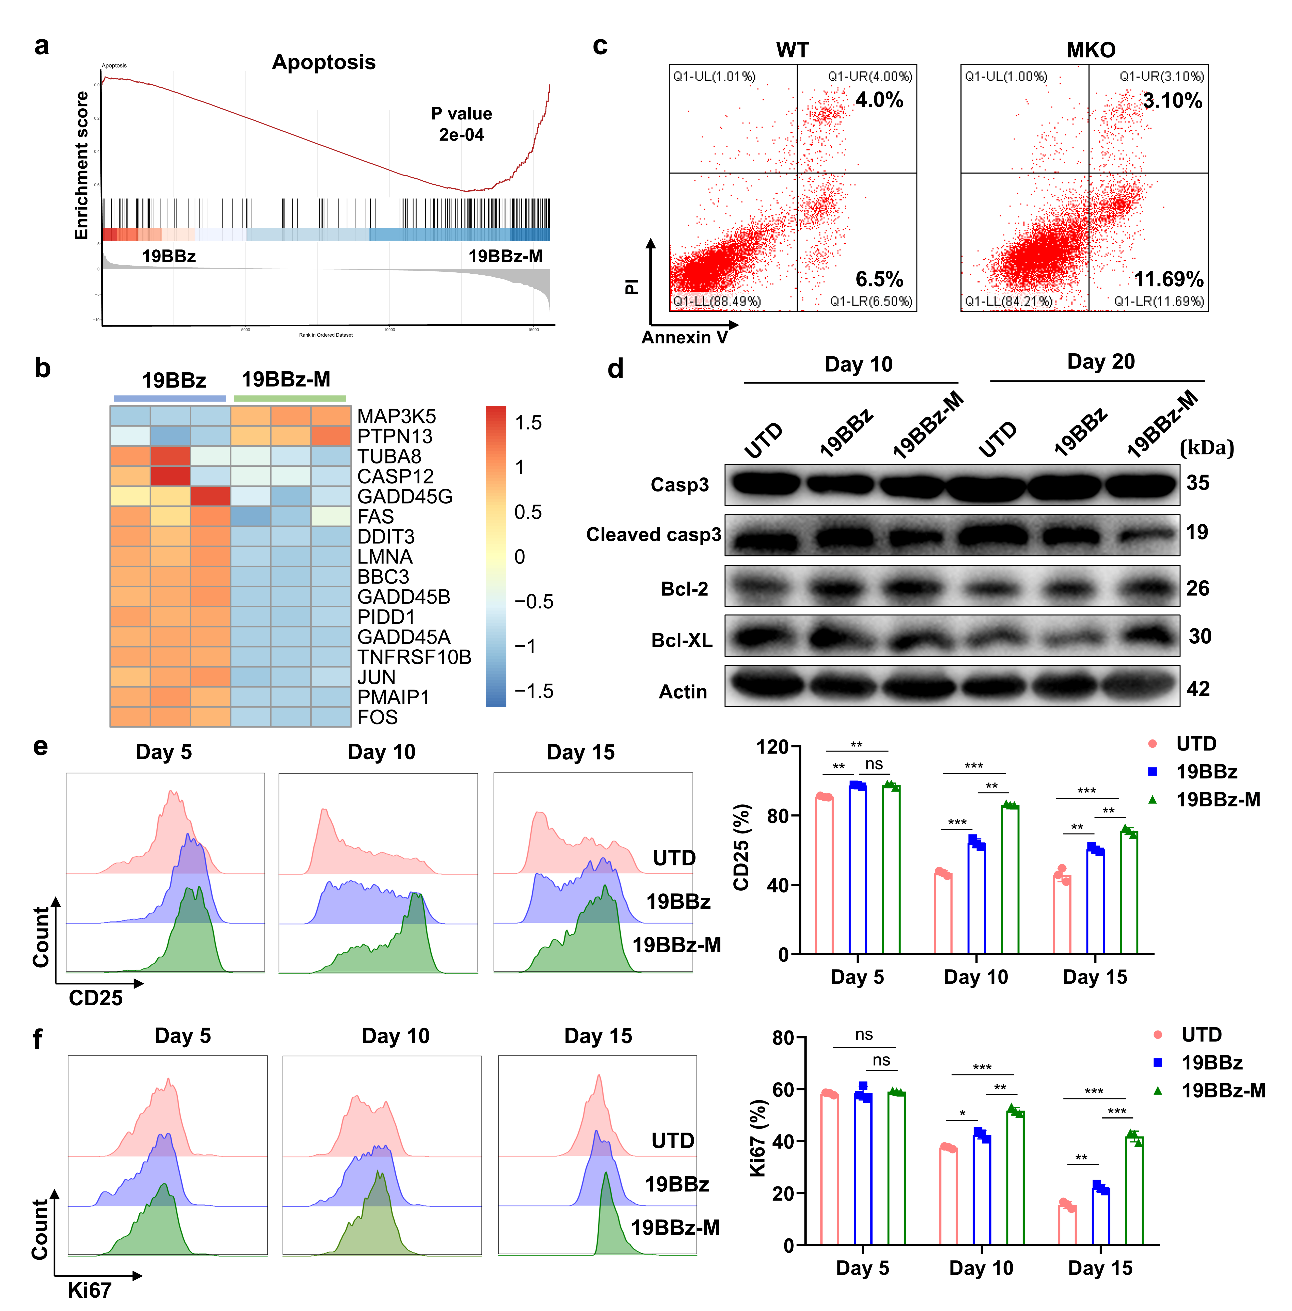


Extended Data Fig. 10. Mysm1 overexpression enhances the viability and proliferative capacity of CAR-T cells.

**a**, GSEA of the apoptosis pathway in 19BBz versus 19BBz-M CAR-T cells. **b**, Heatmap of the apoptosis pathway in 19BBz versus 19BBz-M CAR-T cells. **c**, AnnexinV and PI staining for apoptosis in CAR-T cells by flow cytometry. **d**, Apoptosis-related parameters were measured by western blotting. **e**,**f**, CD25 and Ki67 expression in CAR-T cells by flow cytometry assay. Data are presented as mean ± SD from three independent experiments. ns means no significant difference, **p* < 0.05, ***p* < 0.01, ****p* < 0.001 compared with indicated group by One-way ANOVA.


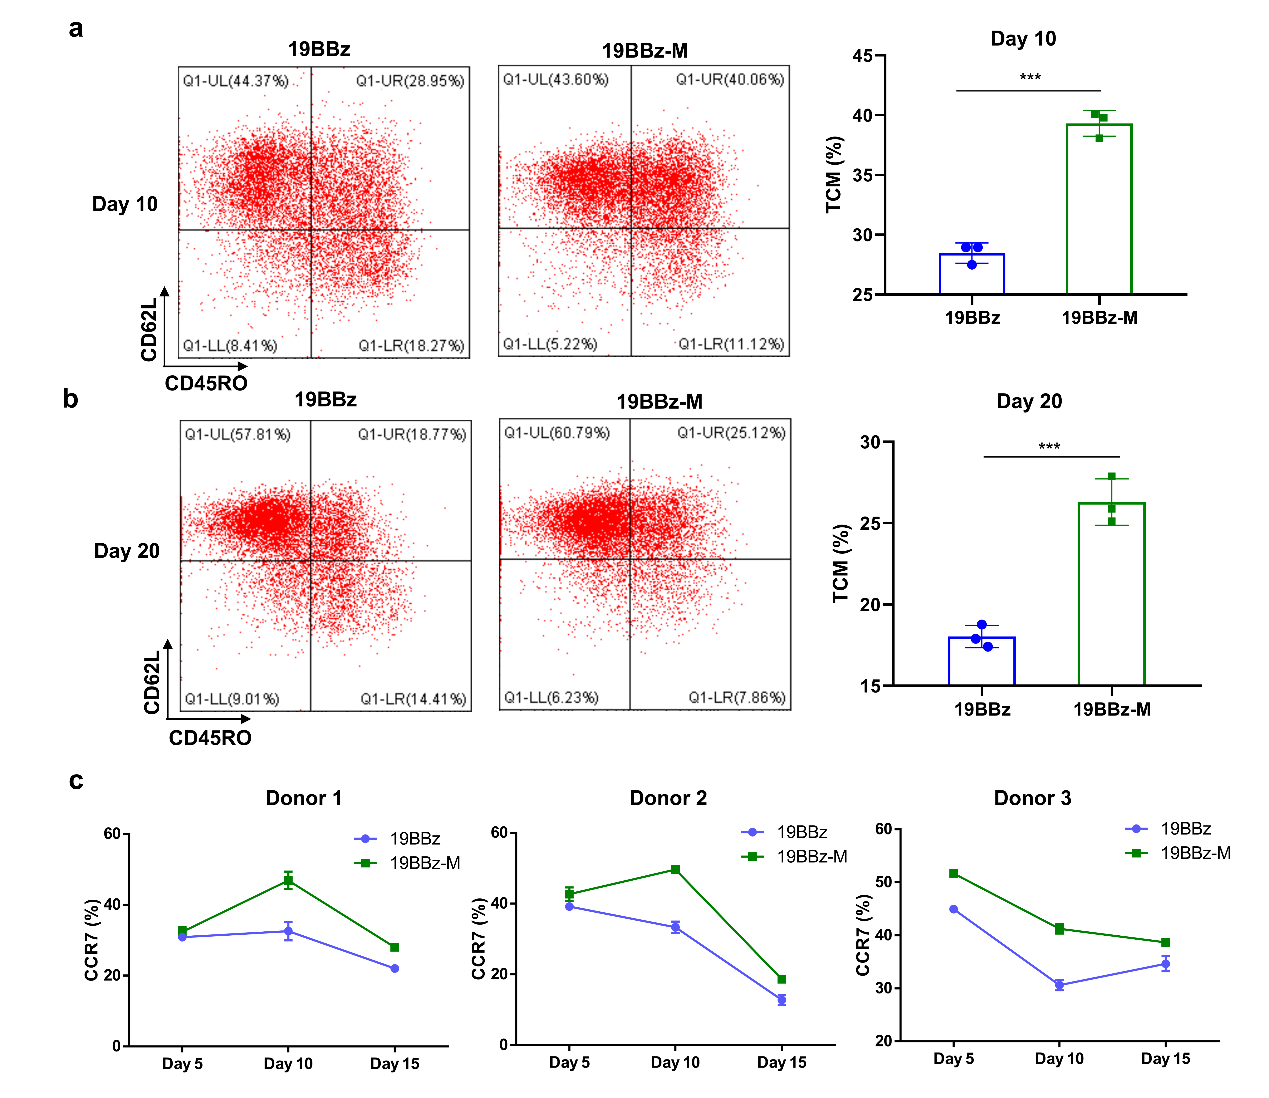


Extended Data Fig. 11. Mysm1 promotes memory phenotype differentiation in CAR-T cells.

**a**,**b**, The central memory phenotype of CAR-T cells was assayed on day 10 and 20. **c**, CCR7 expression on CAR-T cells. Data are presented as mean ± SD from three independent experiments. ****p* < 0.001 compared with indicated group by Student’s *t* test.


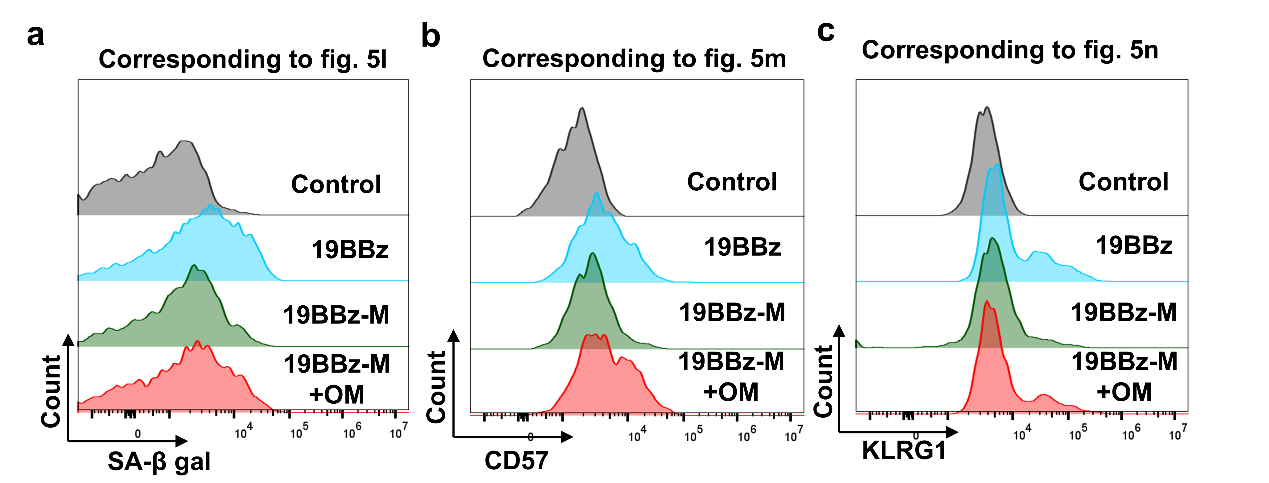


Extended Data Fig. 12. The images of flow cytometry.


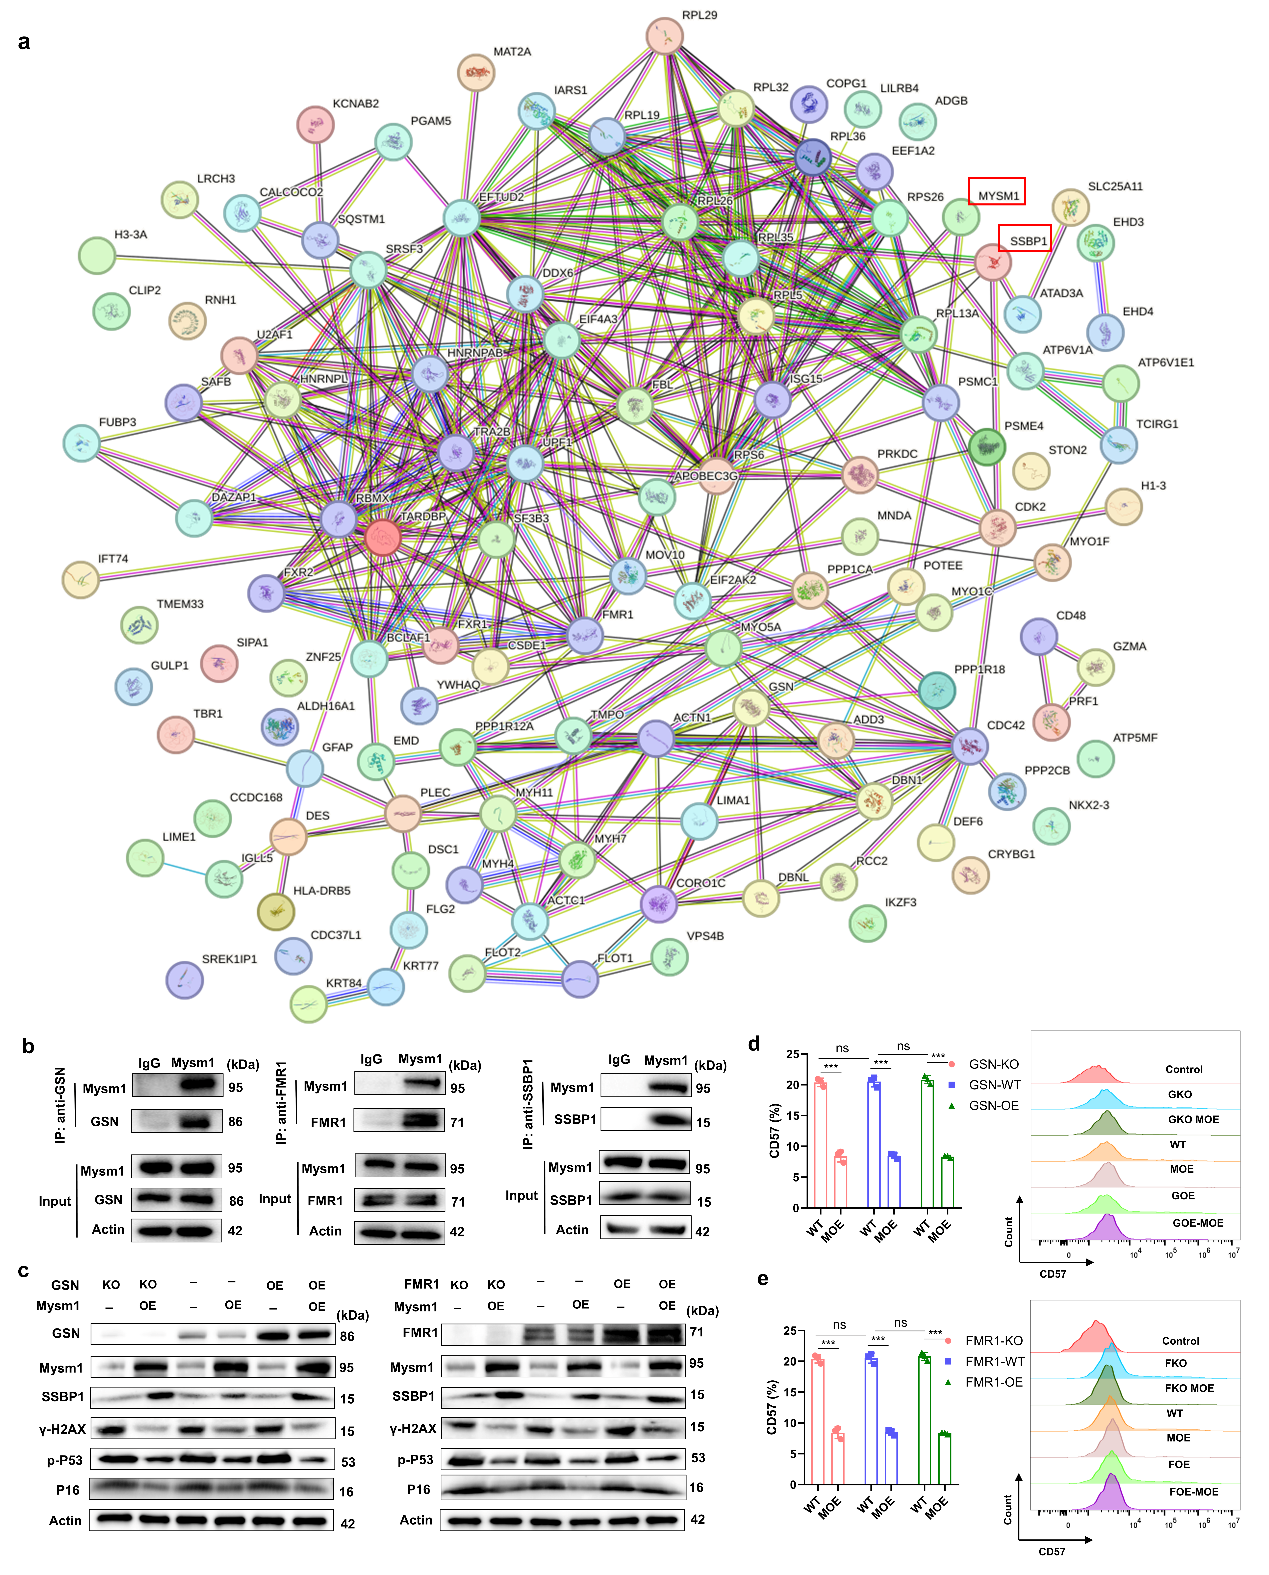


Extended Data Fig. 13. Senescence modulation by Mysm1 occurs independently of GSN and FMR1.

**a**, Proteins co-immunoprecipitated with Mysm1 and their interaction networks. **b**, Endogenous Mysm1 was immunoprecipitated with intrinsic GSN, FMR1 and SSBP1 in human T cells, respectively. **c-e**, Senescent phenotype modulation by Mysm1 occurs independently of GSN and FMR1. Data are presented as mean ± SD from three independent experiments. ns means no significant difference, ****p* < 0.001 compared with indicated group by One-way ANOVA.


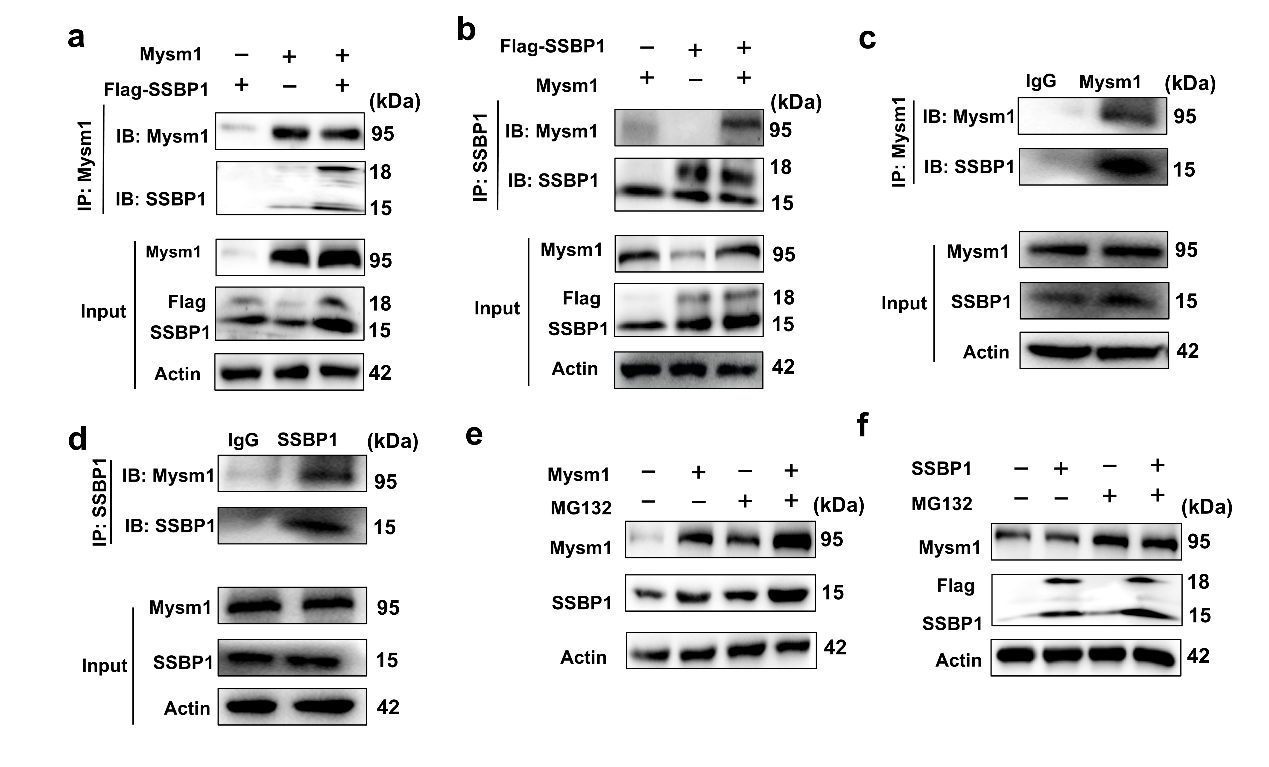


Extended Data Fig. 14. Mysm1 physically interacts with SSBP1 and regulates expression of SSBP1.

**a**, Ectopic SSBP1was immunoprecipitated with Mysm1 in HEK293T cells. **b**, Ectopic Mysm1 was immunoprecipitated with SSBP1 in HEK293T cells. **c**, Endogenous Mysm1 was immunoprecipitated with intrinsic SSBP1 in Jurkat cells. **d**, Endogenous SSBP1 was immunoprecipitated with intrinsic Mysm1 Jurkat cells. **e**,**f**, The regulatory relationship between Mysm1 and SSBP1.


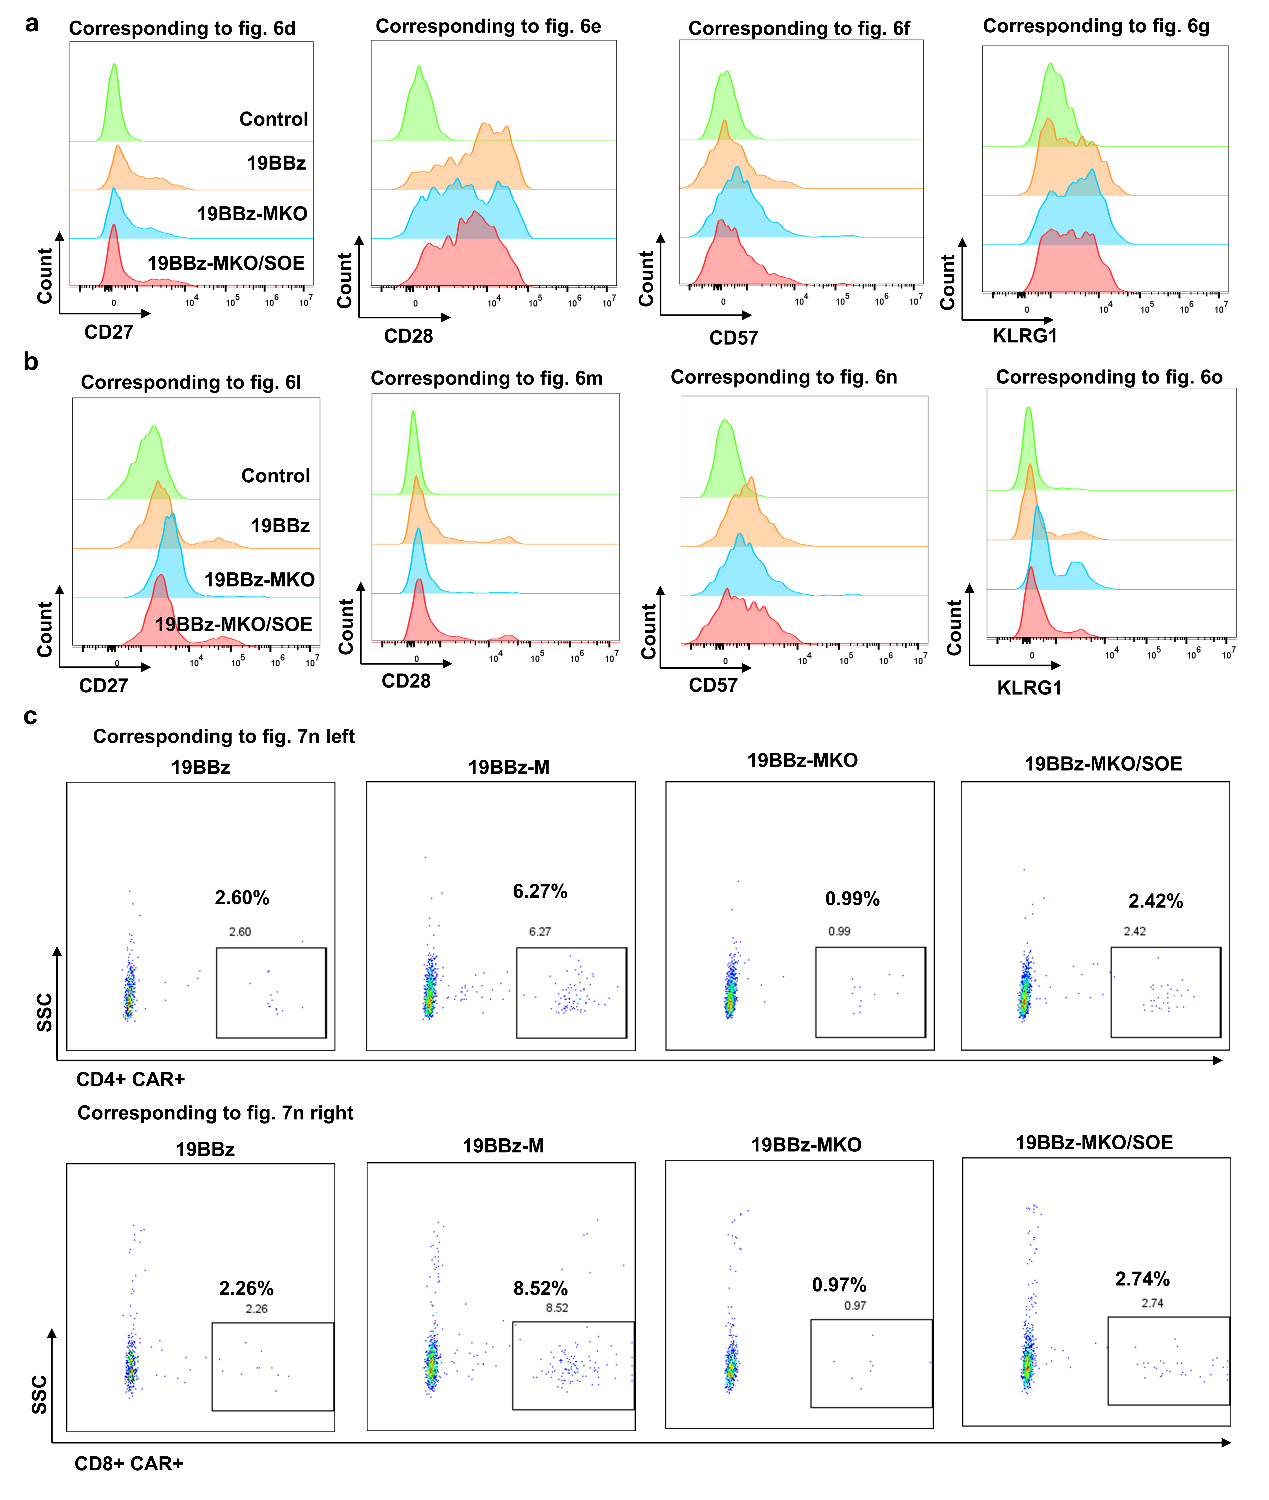


Extended Data Fig. 15. The images of flow cytometry.


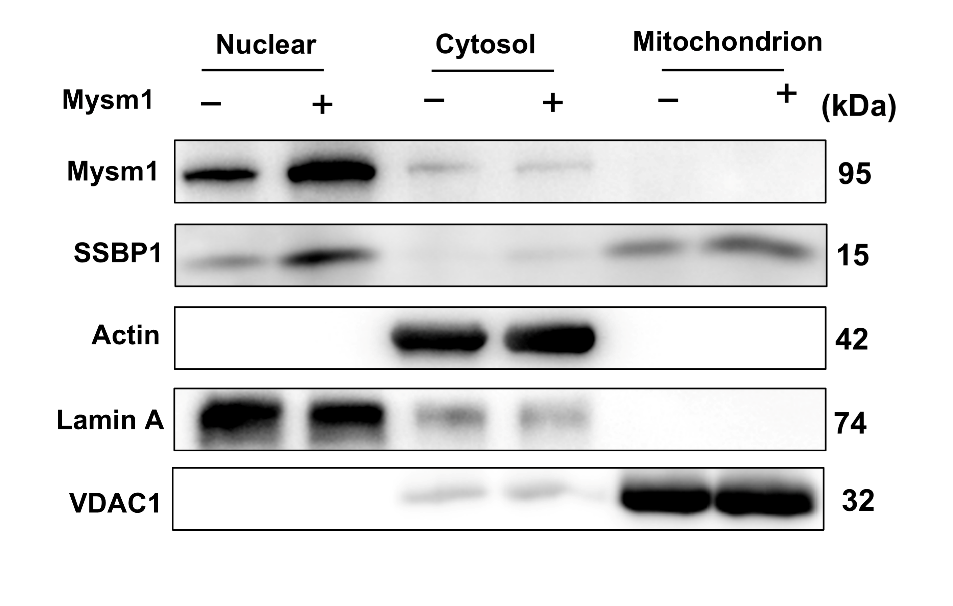


Extended Data Fig. 16. The expression of Mysm1 and SSBP1 in different fractions of human T cells.
